# Supplementary material for: A longitudinal behavioral analysis of aquarium whale sharks (Rhincodon typus): insights into anticipatory cues, individual variation, and social interaction
Source: Frontiers journal article supplement (doi:10.3389/fmars.2024.1418002), 2024-07-05
Supplement: Data_Sheet_1.PDF [file Data_Sheet_1.PDF]

# Supplementary Material

## 1 SUPPLEMENTARY METHODS

### 1.1 Ocean Voyager maintenance

The facility's water treatment and purification system for the 24 million liters of synthetic seawater (Instant Ocean/Spectrum Brands, Blacksburg, Virginia, USA) operates as a sophisticated closed recirculation system. It involves primary water treatment through protein skimming and high-rate sand filtration, facilitated by 70 Fybroc® pumps. The system further incorporates ozone disinfection (up to 30% side stream) and sulfur-based autotrophic denitrification (less than 1% side stream) for effective purification. Water then passes through a degas tower, maintaining appropriate gas balance and biological filtration, equipped with a 2.5-meter deep layer of AccuPac® plastic media (Brentwood Industries, Reading, Pennsylvania), covering a total surface area of 107,000 square meters. This setup allows for rapid system turnover of around 1 hour. Additionally, the system includes a recovery mechanism for backwash water from sand filters, which is processed and reused, significantly conserving water and sea salt resources. For a more in-depth explanation of the specialized water filtration device and exact details, please refer to Schreiber and Coco (2017) or Dove et al. (2011)

### 1.2 Time of day analyses

Day and night times were determined using the complete earth calculation (Sun, 2023) as a function of i) the Julian day at the time of observation, ii) the latitude, longitude, and altitude of the city of Atlanta, and finally iii) corrected for atmospheric refraction (US Department of Commerce, 2005). This calculation was performed on the full empirical datetime array of observations within the 4 years of study, hence the slight variations between black contours in figures S4 and S6.

### 1.3 Entropy and similarity indices

Shannon entropy, or the Shannon-Wiener index,  $H$  was calculated as follows:

$$H = - \sum_{i=1}^k p_i \log_2(p_i) \quad (\text{S1})$$

where  $k$  is the number of depths and  $p_i$  is the proportion at each depth.

Simpson's similarity index  $l$  was calculated as follows:

$$l = \frac{\sum_{i=1}^k n_i(n_i - 1)}{N(N - 1)} \quad (\text{S2})$$

where  $k$  is the number of depths,  $n_i$  is the number of observations at each depth, and  $N$  is the total observations for that shark.

## 2 SUPPLEMENTARY TABLES AND FIGURES

### 2.1 Figures

#### Taxonomy of species in Ocean Voyager (OV)

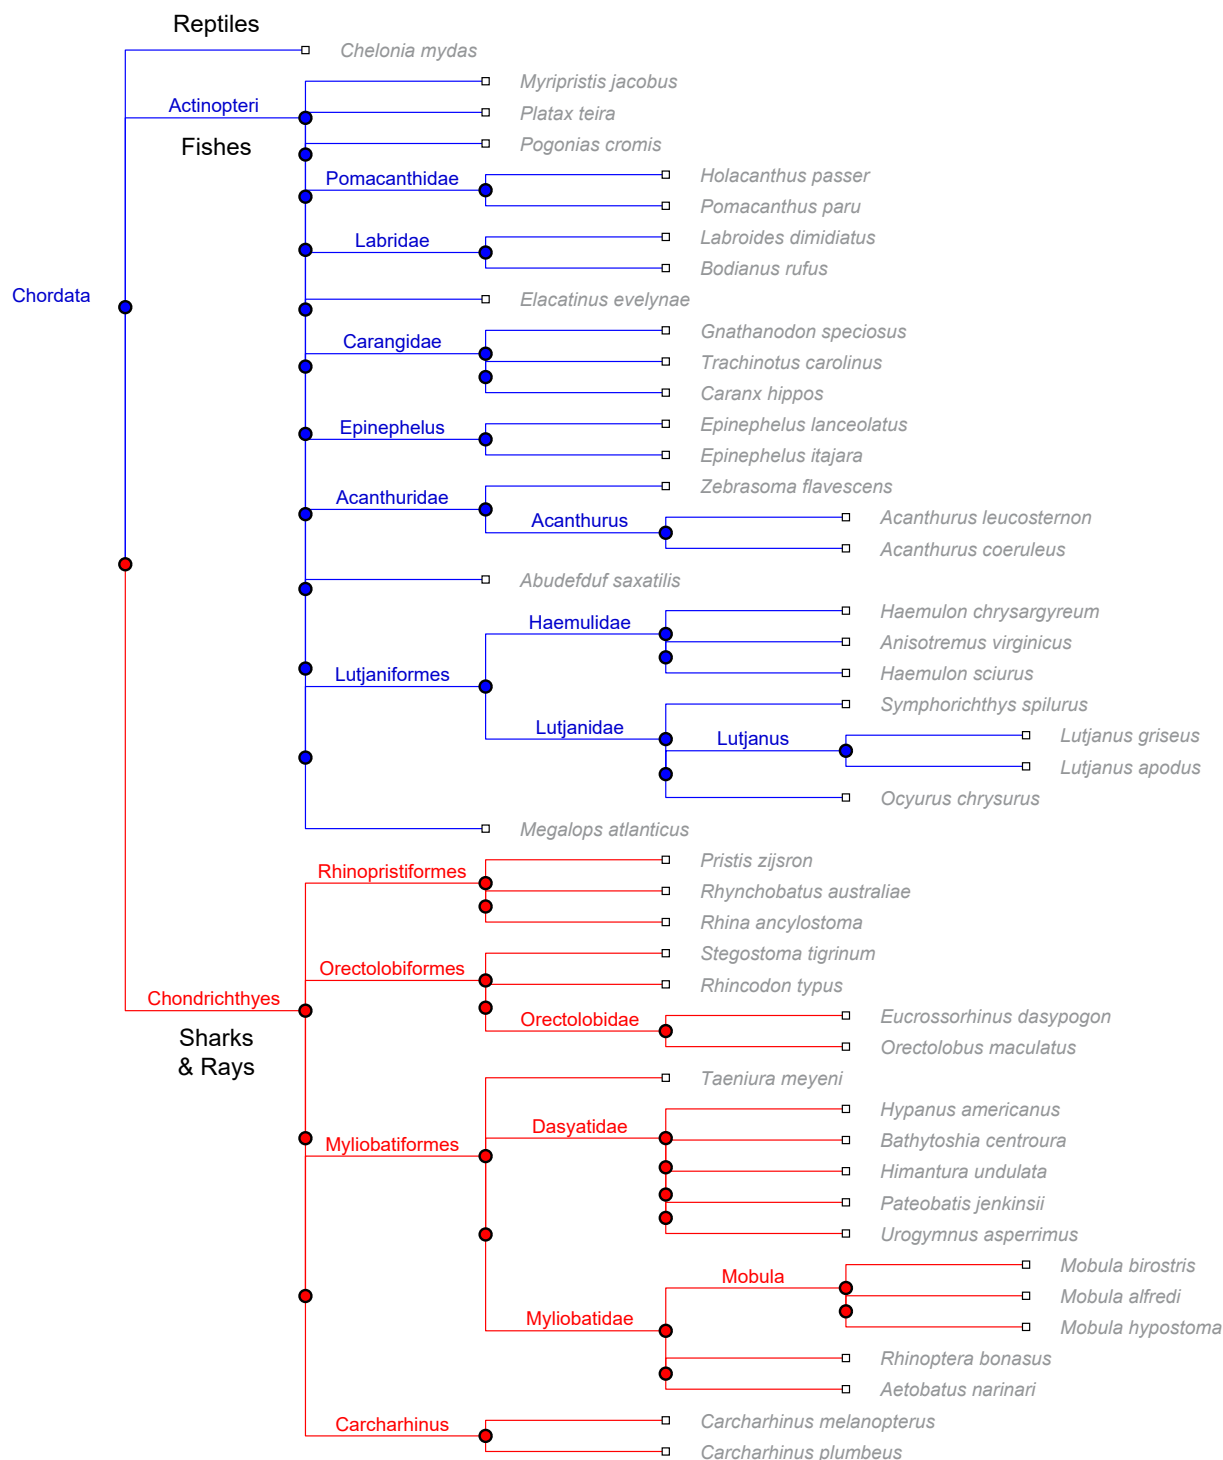

**Figure S1. Species cohabitating in Ocean Voyager.** OV is home to 46 species of fish, sharks and rays, and one reptile. Common name, scientific name, LSID, and their year of original description can be found in Table S1 below.

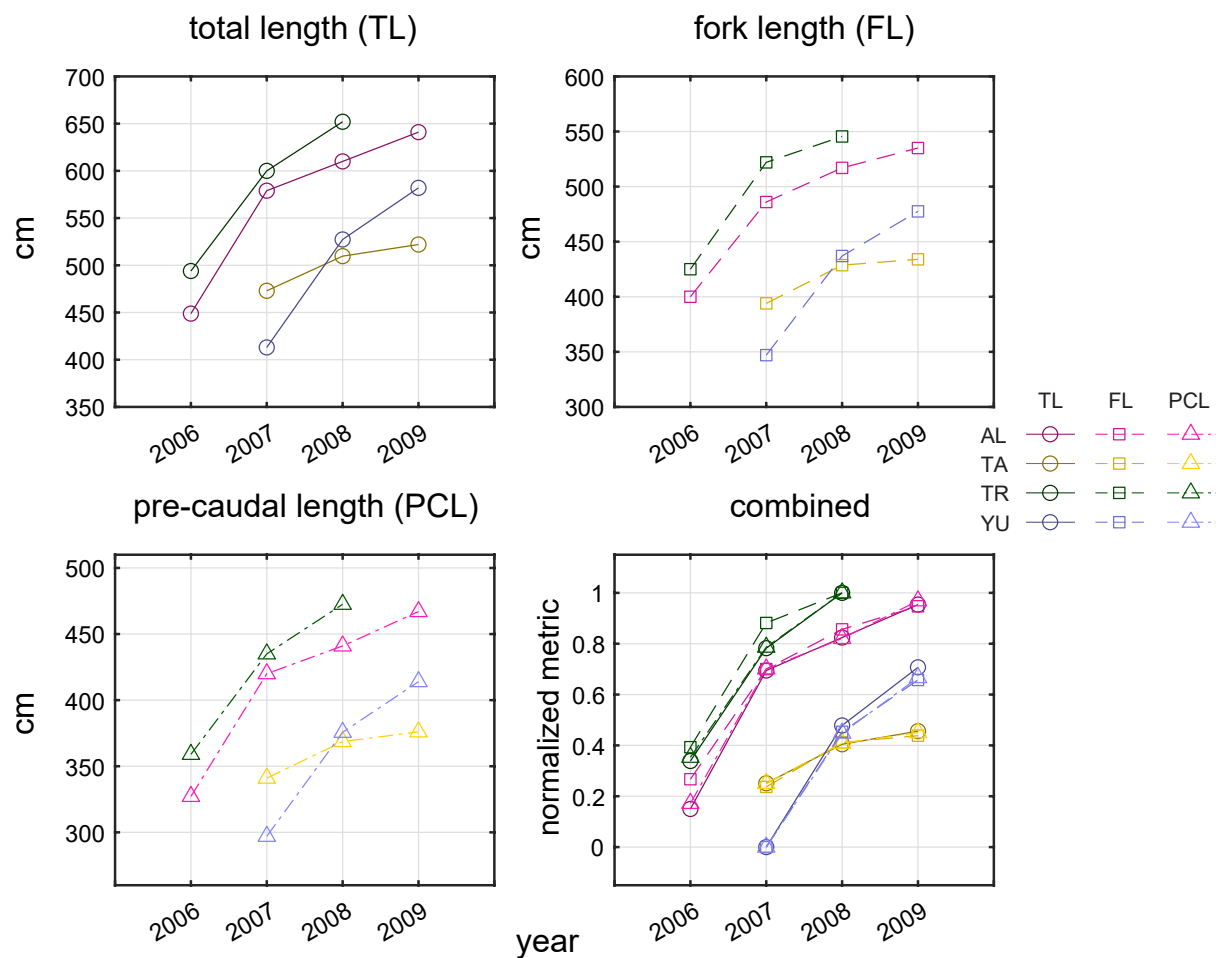

**Figure S2. Concordant morphometric measurements for each shark each year.** Common size metrics two years prior to study onset and during the first two years of study. Normalized length measurements in the bottom right quadrant illustrate the correlated relationship between total length (TL), fork length (FL), and pre-caudal length (PCL).

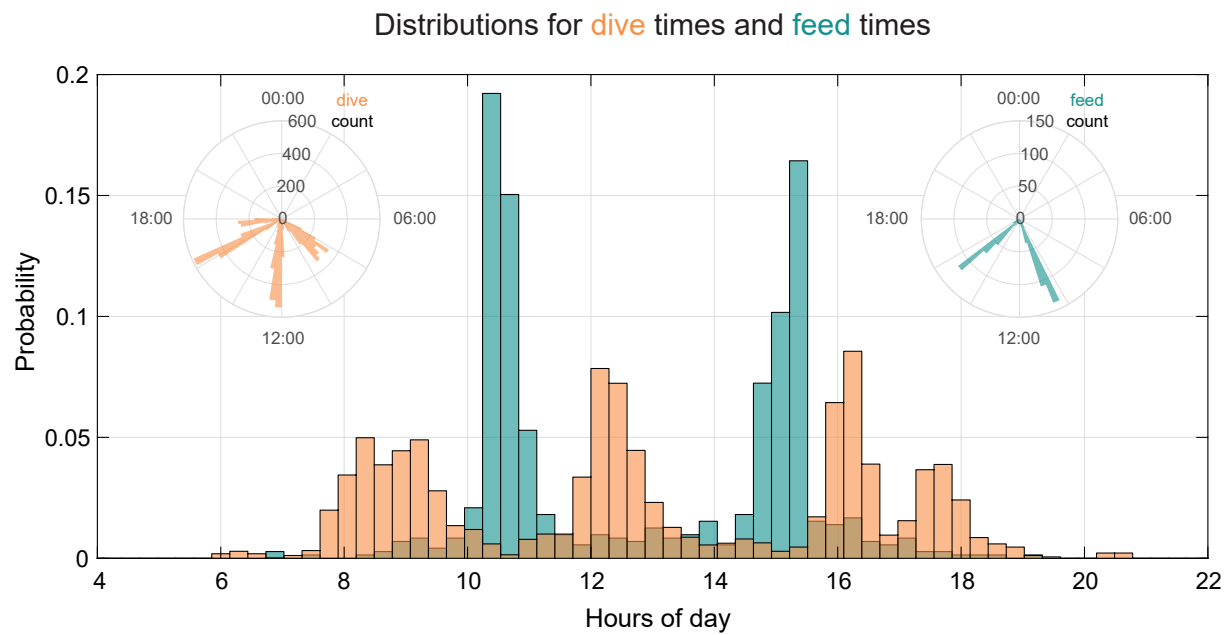

**Figure S3. Divers were not present during feed.** Time histograms juxtaposing periods where divers were indicated in the water with notes indicating shark feed.

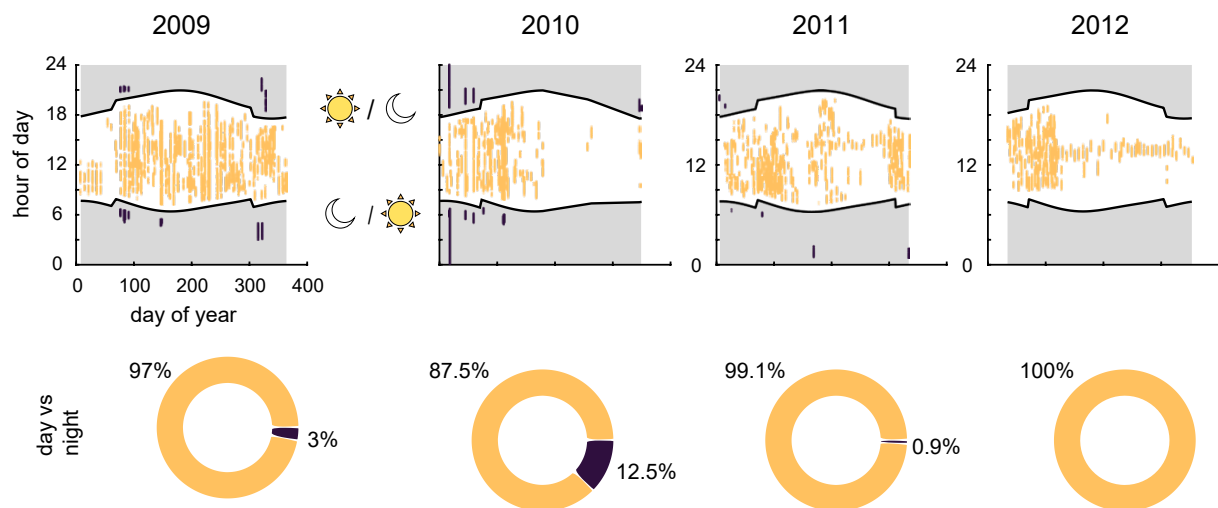

**Figure S4. Expanded chronology of observations differentiating day and night for each full year.** **Top:** Observations for years 2009-2012 of the study plotted as a raster, where each dot represents 1 observation with its corresponding day of year (x-axis) and time of day (y-axis), illustrating the chronology of active and inactive periods. Black lines near hours 6 and 18 show daylight hours (white region) and transitions to night (gray shaded region). **Bottom:** Proportion of observations for each year which fell into these daylight categories, expressed as a percentage.

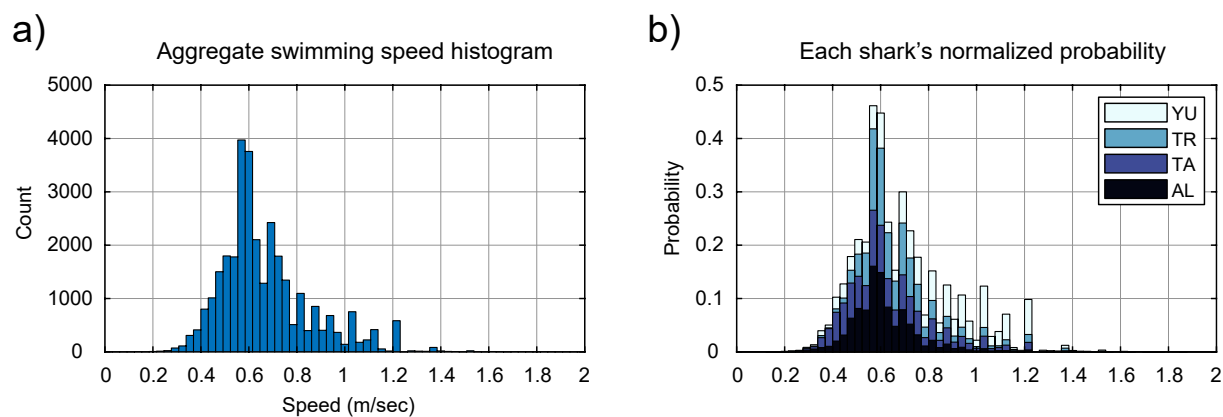

**Figure S5. Raw aggregate and individually split speed distributions.** (a) Histogram of the aggregate swimming speed of all sharks (N=4; mean = 0.67 m/sec). (b) Stacked histogram of swim speed normalized to a probability for each individual shark.

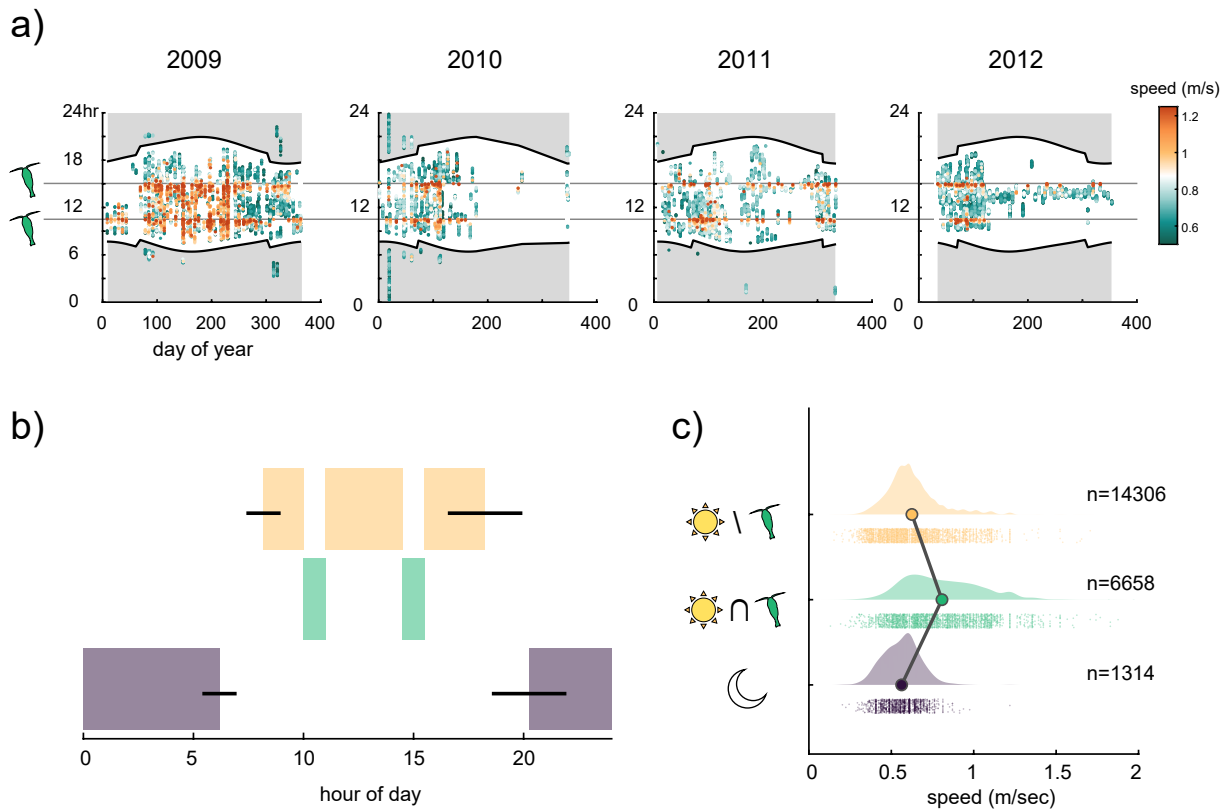

**Figure S6. Expanded chronology shows feed times account for most of the values at the right-tail of the speed distribution.** (a) Day and night split observations colored by shark swim speed, with feed times at plankton marked y-lines. Black contours again demarcate daylight hours (white region) and transitions to night (gray shaded region). (b) Illustrates the time windows that comprise three relevant analysis groups: the set difference between daylight and feed (i.e. daylight excluding feed; orange), the intersection of daylight and feed (green), and night-time observations (purple), with black lines representing the sliding nature of this definition based on the daylight savings (DLS)-corrected time of year. (c) Distributions for these three non-overlapping time windows ( $\bar{X}_{D_{exclfeed}} = 0.62 \pm 0.16$ ,  $\bar{X}_{D_{inclfeed}} = 0.81 \pm 0.23$ ,  $\bar{X}_N = 0.56 \pm 0.11$ )

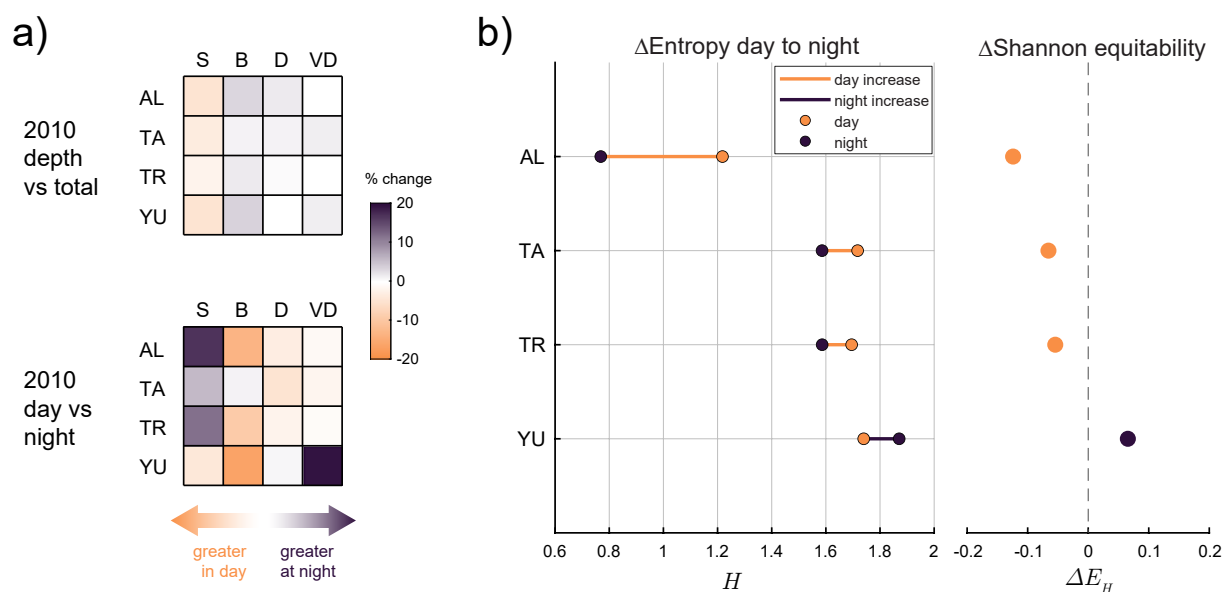

**Figure S7. Differences in spatial preference from day to night.** (a) Depth proportions for the year 2010 were highly representative of the overall depth preferences for the entire study (top). Day to night differences in 2010 plotted on the same scale show wider variability (bottom). (b) Shannon entropy ( $H$ ) and change in Shannon equitability ( $\Delta E_H$ ) across 2010 day and night observations.



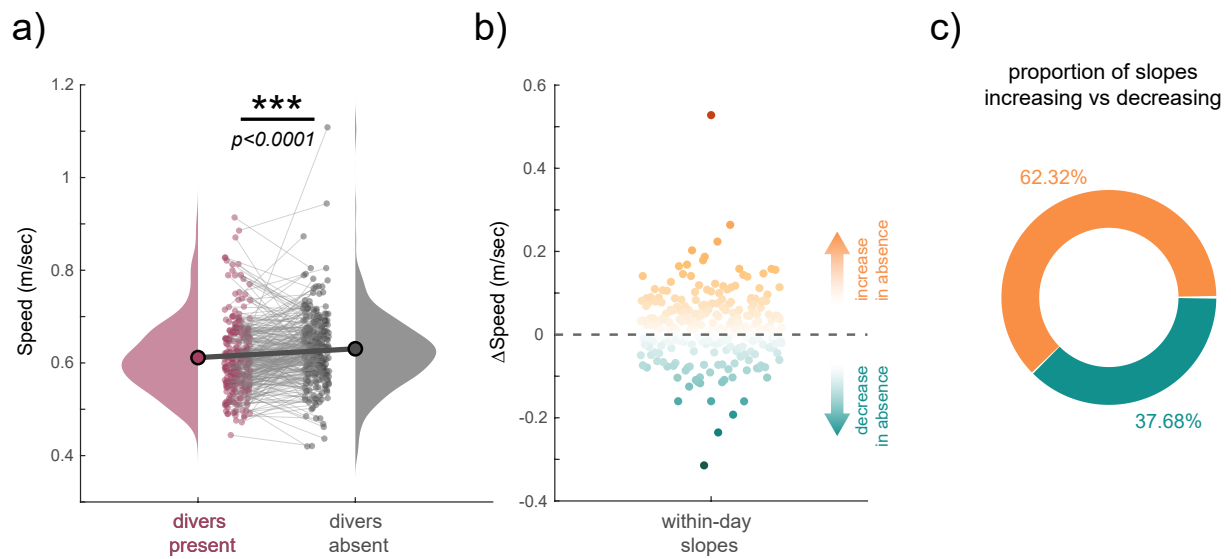

**Figure S8. Marginal speed increase when divers are absent from the exhibit.** (a) Within-day paired t-test of swim speed (excluding feed window) when divers were present or absent from the exhibit shows a slight mean speed increase in absence of divers  $\bar{X}_{present} = 0.61 \pm 0.08$  vs  $\bar{X}_{absent} = 0.63 \pm 0.08$ ,  $t(275) = 3.96$ ,  $p < 0.0001$ . (b) Plotting the distributions of line slopes shows that speed increased more times than not in absence (orange), expressed as a percentage in (c).

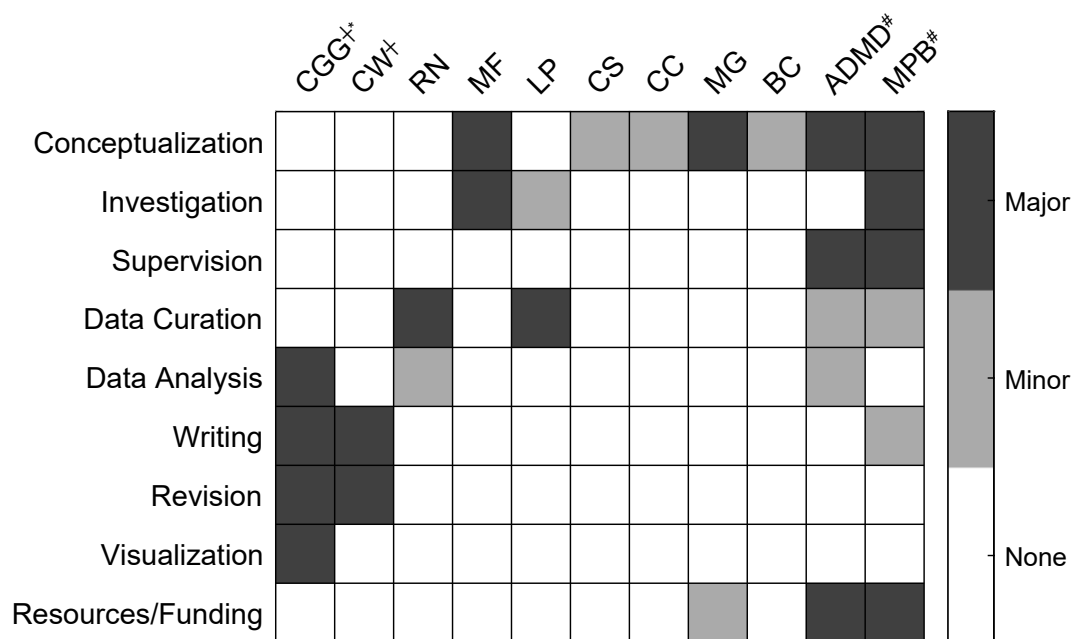

**Figure S9. Specific contributions by all listed authors.** Using 9 of 14 applicable terms from the Brand et al. (2015) CReDiT taxonomy.

Table S1: Entire species list for OV exhibit. LSIDs have the prefix "urn:lsid:marinespecies.org:taxname:", and were obtained from the World Register of Marine Species (WoRMS)

| Class         | Common name               | Scientific name                    | LSID    | Original description         |
|---------------|---------------------------|------------------------------------|---------|------------------------------|
| Fish          | Black Drum                | <i>Pogonias cromis</i>             | 159333  | Linnaeus, 1776               |
|               | Blackbar Soldierfish      | <i>Myripristis jacobus</i>         | 159385  | Cuvier, 1829                 |
|               | Blue Tang SurgeonFish     | <i>Acanthurus coeruleus</i>        | 159581  | Bloch & Schneider, 1801      |
|               | Bluestreak Cleaner Wrasse | <i>Labroides dimidiatus</i>        | 219014  | Valenciennes, 1839           |
|               | Bluestriped Grunt         | <i>Haemulon sciurus</i>            | 275733  | Shaw, 1803                   |
|               | Crevalle Jack             | <i>Caranx hippos</i>               | 126803  | Linnaeus, 1776               |
|               | Florida Pompano           | <i>Trachinotus carolinus</i>       | 159652  | Linnaeus, 1766               |
|               | French Angelfish          | <i>Pomacanthus paru</i>            | 276025  | Bloch, 1787                  |
|               | Giant Grouper             | <i>Epinephelus lanceolatus</i>     | 218224  | Bloch, 1790                  |
|               | Golden Trevally           | <i>Gnathanodon speciosus</i>       | 218429  | Forsskål, 1775               |
|               | Goliath Grouper           | <i>Epinephelus itajara</i>         | 159353  | Lichtenstein, 1822           |
|               | Gray Snapper              | <i>Lutjanus griseus</i>            | 159797  | Linnaeus, 1758               |
|               | King Angelfish            | <i>Holacanthus passer</i>          | 276016  | Valenciennes, 1846           |
|               | Longfin Batfish           | <i>Platax teira</i>                | 218710  | Forsskål, 1775               |
|               | Porkfish                  | <i>Anisotremus virginicus</i>      | 279625  | Linnaeus, 1758               |
|               | Powder Blue Tang          | <i>Acanthurus leucosternon</i>     | 219628  | Bennett, 1833                |
|               | Sailfin Snapper           | <i>Symphoricarichthys spilurus</i> | 282914  | Günther, 1874                |
|               | Schoolmaster Snapper      | <i>Lutjanus apodus</i>             | 159793  | Walbaum, 1792                |
|               | Seargant Major            | <i>Abudefduf saxatilis</i>         | 159288  | Linnaeus, 1758               |
|               | Sharknose Goby            | <i>Elacatinus evelynae</i>         | 280601  | Böhlke & Robins, 1968        |
|               | Smallmouth Grunt          | <i>Haemulon chrysargyreum</i>      | 275725  | Günther, 1859                |
|               | Spanish Hogfish           | <i>Bodianus rufus</i>              | 273541  | Linnaeus, 1758               |
|               | Tarpon                    | <i>Megalops atlanticus</i>         | 126430  | Valenciennes, 1847           |
|               | Yellow Tang               | <i>Zebrasoma flavescens</i>        | 219683  | Bennett, 1828                |
|               | Yellowtail Snapper        | <i>Ocyurus chrysurus</i>           | 159803  | Bloch, 1791                  |
| Sharks & Rays | Blacktip Reef Shark       | <i>Carcharhinus melanopterus</i>   | 105795  | Quoy & Gaimard, 1824         |
|               | Bottlenose Wedgefish      | <i>Rhynchobatus australiae</i>     | 278217  | Whitley, 1939                |
|               | Bowmouth Guitarfish       | <i>Rhina ancylostoma</i>           | 217377  | Bloch & Schneider, 1801      |
|               | Cownose Ray               | <i>Rhinoptera bonasus</i>          | 158544  | Mitchill, 1815               |
|               | Leopard Whipray           | <i>Himantura undulata</i>          | 217413  | Bleeker, 1852                |
|               | Lesser Devil Ray          | <i>Mobula hypostoma</i>            | 158530  | Bancroft, 1831               |
|               | Longcomb Sawfish          | <i>Pristis zijsron</i>             | 217375  | Bleeker, 1851                |
|               | Manta Ray                 | <i>Mobula birostris</i>            | 1026118 | Walbaum, 1792                |
|               | Pointed-Nose Stingray     | <i>Pateobatis jenkinsii</i>        | 1026118 | Annandale, 1909              |
|               | Porcupine Ray             | <i>Urogymnus asperrimus</i>        | 217424  | Bloch & Schneider, 1801      |
|               | Reef Manta Ray            | <i>Mobula alfredi</i>              | 1042871 | Kreff, 1868                  |
|               | Roughtail Stingray        | <i>Dasyatis centroura</i>          | 105850  | Mitchill, 1815               |
|               | Round Ribbontail Ray      | <i>Taeniurops meyeri</i>           | 712972  | Müller & Henle, 1841         |
|               | Sandbar Shark             | <i>Carcharhinus plumbeus</i>       | 105797  | Nardo, 1827                  |
|               | Southern Stingray         | <i>Hypanus americanus</i>          | 1042856 | Hildebrand & Schroeder, 1928 |
|               | Spotted Eagle Ray         | <i>Aetobatus narinari</i>          | 217426  | Euphrasen, 1790              |
|               | Spotted Wobbegong         | <i>Orectolobus maculatus</i>       | 281931  | Bonnaterre, 1788             |

|                |                     |                                 |        |                |
|----------------|---------------------|---------------------------------|--------|----------------|
|                | Tasselled Wobbegong | <i>Eucrossorhinus dasypogon</i> | 298163 | Bleeker, 1867  |
|                | Whale Shark         | <i>Rhincodon typus</i>          | 105847 | Smith, 1828    |
|                | Zebra Shark         | <i>Stegostoma tigrinum</i>      | 313100 | Forster, 1781  |
| <b>Reptile</b> | Green Sea Turtle    | <i>Chelonia mydas</i>           | 137206 | Linnaeus, 1758 |

---

**Table S2.** Depth observations for the entire study.

|    | <b>Surface</b> | <b>Below<br/>Surface</b> | <b>Deep</b> | <b>Very<br/>Deep</b> |
|----|----------------|--------------------------|-------------|----------------------|
| AL | 7236           | 2296                     | 500         | 116                  |
| TA | 3449           | 2909                     | 1388        | 271                  |
| TR | 3584           | 2872                     | 1478        | 339                  |
| YU | 2353           | 1275                     | 726         | 288                  |

**Table S3.** Pairwise Fisher's exact test of depth. Significant p-values are in **bold**.

| <b>Figure 4   Panel B</b> |                  |               |                |                              |                         |                            |
|---------------------------|------------------|---------------|----------------|------------------------------|-------------------------|----------------------------|
| <b>Comparison</b>         |                  | <b>Depth</b>  | <b>Test</b>    | <b>Bonferroni Correction</b> | <b>Critical p-value</b> | <b>Signif.</b>             |
| <b>Tested</b>             | <b>Reference</b> |               |                |                              |                         |                            |
| AL                        | TA               | Surface       | Fisher's exact | 24 comparisons               | $5.21 \times 10^{-4}$   | $p = 2.0 \times 10^{-323}$ |
|                           | TR               |               |                |                              |                         | $p = 3.4 \times 10^{-322}$ |
|                           | YU               |               |                |                              |                         | $p = 4.9 \times 10^{-131}$ |
| TA                        | TR               | Below Surface | Fisher's exact | 24 comparisons               | $5.21 \times 10^{-4}$   | $p = 0.6922$               |
|                           | YU               |               |                |                              |                         | $p = 7.0 \times 10^{-17}$  |
| TR                        | YU               |               |                |                              |                         | $p = 6.7 \times 10^{-16}$  |
| AL                        | TA               | Below Surface | Fisher's exact | 24 comparisons               | $5.21 \times 10^{-4}$   | $p = 8.6 \times 10^{-91}$  |
|                           | TR               |               |                |                              |                         | $p = 7.2 \times 10^{-74}$  |
|                           | YU               |               |                |                              |                         | $p = 1.6 \times 10^{-10}$  |
| TA                        | TR               | Below Surface | Fisher's exact | 24 comparisons               | $5.21 \times 10^{-4}$   | $p = 0.0376$               |
|                           | YU               |               |                |                              |                         | $p = 2.6 \times 10^{-24}$  |
| TR                        | YU               |               |                |                              |                         | $p = 2.6 \times 10^{-17}$  |
| AL                        | TA               | Deep          | Fisher's exact | 24 comparisons               | $5.21 \times 10^{-4}$   | $p = 3.3 \times 10^{-162}$ |
|                           | TR               |               |                |                              |                         | $p = 6.5 \times 10^{-175}$ |
|                           | YU               |               |                |                              |                         | $p = 1.4 \times 10^{-106}$ |
| TA                        | TR               | Deep          | Fisher's exact | 24 comparisons               | $5.21 \times 10^{-4}$   | $p = 0.3543$               |
|                           | YU               |               |                |                              |                         | $p = 0.0142$               |
| TR                        | YU               |               |                |                              |                         | $p = 0.0012$               |
| AL                        | TA               | Very Deep     | Fisher's exact | 24 comparisons               | $5.21 \times 10^{-4}$   | $p = 3.0 \times 10^{-25}$  |
|                           | TR               |               |                |                              |                         | $p = 1.3 \times 10^{-37}$  |
|                           | YU               |               |                |                              |                         | $p = 1.0 \times 10^{-68}$  |
| TA                        | TR               | Very Deep     | Fisher's exact | 24 comparisons               | $5.21 \times 10^{-4}$   | $p = 0.0149$               |
|                           | YU               |               |                |                              |                         | $p = 7.4 \times 10^{-14}$  |
| TR                        | YU               |               |                |                              |                         | $p = 1.1 \times 10^{-7}$   |

**Table S4.** Depth observations from 2010 split by day and night.

|    | Day     |               |      |           | Night   |               |      |           |
|----|---------|---------------|------|-----------|---------|---------------|------|-----------|
|    | Surface | Below Surface | Deep | Very Deep | Surface | Below Surface | Deep | Very Deep |
| AL | 1175    | 457           | 114  | 18        | 188     | 29            | 8    | 0         |
| TA | 605     | 567           | 277  | 73        | 92      | 77            | 27   | 6         |
| TR | 585     | 517           | 261  | 58        | 95      | 49            | 29   | 6         |
| YU | 319     | 216           | 108  | 53        | 70      | 25            | 27   | 45        |

**Table S5.** Pairwise Fisher's exact tests of depth by day and night for a given shark against all others. Significant p-values are in **bold**.

| <b>Figure 4   Panel C</b> |                  |               |                |                              |                         |                                             |
|---------------------------|------------------|---------------|----------------|------------------------------|-------------------------|---------------------------------------------|
| <b>Comparison</b>         |                  | <b>Depth</b>  | <b>Test</b>    | <b>Bonferroni Correction</b> | <b>Critical p-value</b> | <b>Signif.</b>                              |
| <b>Tested</b>             | <b>Reference</b> |               |                |                              |                         |                                             |
| AL                        | all others       | Surface       | Fisher's exact | 16 comparisons               | $7.81 \times 10^{-4}$   | $p = 0.5703$                                |
| TA                        |                  |               |                |                              |                         | $p = 0.4239$                                |
| TR                        |                  |               |                |                              |                         | $p = 0.8526$                                |
| YU                        |                  |               |                |                              |                         | $p = 0.0295$                                |
| AL                        | all others       | Below Surface | Fisher's exact | 16 comparisons               | $7.81 \times 10^{-4}$   | $p = 0.0029$                                |
| TA                        |                  |               |                |                              |                         | $p = 0.0060$                                |
| TR                        |                  |               |                |                              |                         | $p = 0.6057$                                |
| YU                        |                  |               |                |                              |                         | $p = 0.5529$                                |
| AL                        | all others       | Deep          | Fisher's exact | 16 comparisons               | $7.81 \times 10^{-4}$   | $p = 0.1524$                                |
| TA                        |                  |               |                |                              |                         | $p = 0.2469$                                |
| TR                        |                  |               |                |                              |                         | $p = 0.7257$                                |
| YU                        |                  |               |                |                              |                         | <b><math>p = 3.9 \times 10^{-4}</math></b>  |
| AL                        | all others       | Very Deep     | Fisher's exact | 16 comparisons               | $7.81 \times 10^{-4}$   | $p = 0.0158$                                |
| TA                        |                  |               |                |                              |                         | <b><math>p = 1.4 \times 10^{-4}</math></b>  |
| TR                        |                  |               |                |                              |                         | $p = 0.0050$                                |
| YU                        |                  |               |                |                              |                         | <b><math>p = 7.6 \times 10^{-13}</math></b> |



**Table S6.** Frequencies and comparisons for lead-follow interactions in Figure 5. Significant p-values are in **bold**.

| <b>Figure 5   Panel C</b> |                 |              |             |                              |                         |                                             |
|---------------------------|-----------------|--------------|-------------|------------------------------|-------------------------|---------------------------------------------|
| <b>Comparison</b>         |                 | <b>Count</b> | <b>Test</b> | <b>Bonferroni Correction</b> | <b>Critical p-value</b> | <b>Signif.</b>                              |
| <b>Leader</b>             | <b>Follower</b> |              |             |                              |                         |                                             |
| AL                        | TA              | 388          | Chi-square  | 12 comparisons               | 0.0042                  | <b><math>p = 3.3 \times 10^{-12}</math></b> |
|                           | TR              | 341          |             |                              |                         | <b><math>p = 2.7 \times 10^{-6}</math></b>  |
|                           | YU              | 99           |             |                              |                         | $p = 1$                                     |
| TA                        | AL              | 359          | Chi-square  | 12 comparisons               | 0.0042                  | <b><math>p = 2.1 \times 10^{-15}</math></b> |
|                           | TR              | 309          |             |                              |                         | <b><math>p = 2.6 \times 10^{-5}</math></b>  |
|                           | YU              | 86           |             |                              |                         | $p = 1$                                     |
| TR                        | AL              | 268          | Chi-square  | 12 comparisons               | 0.0042                  | <b><math>p = 8.8 \times 10^{-5}</math></b>  |
|                           | TA              | 273          |             |                              |                         | <b><math>p = 4.0 \times 10^{-4}</math></b>  |
|                           | YU              | 105          |             |                              |                         | $p = 0.27$                                  |
| YU                        | AL              | 93           | Chi-square  | 12 comparisons               | 0.0042                  | $p = 0.84$                                  |
|                           | TA              | 92           |             |                              |                         | $p = 0.98$                                  |
|                           | TR              | 69           |             |                              |                         | $p = 1$                                     |

## REFERENCES

- [Dataset] (2023). Sunrise equation. [https://en.wikipedia.org/wiki/Sunrise\\_equation#Complete\\_calculation\\_on\\_Earth](https://en.wikipedia.org/wiki/Sunrise_equation#Complete_calculation_on_Earth)
- Brand, A., Allen, L., Altman, M., Hlava, M., and Scott, J. (2015). Beyond authorship: Attribution, contribution, collaboration, and credit. *Learned Publishing* 28, 151–155. doi:10.1087/20150211
- Dove, A. D. M., Coco, C., Binder, T., Schreiber, C., Davis, R., Carlson, B., et al. (2011). Acquisition, Husbandry, And Veterinary Care Of Whale Sharks (*Rhincodon typus* Smith 1828) In An Aquarium Setting. In *Third Bilateral Conference Between the United States and Russia* (Shepherdstown, WV: Khaled bin Sultan Living Oceans Foundation), 12–20
- Schreiber, C. and Coco, C. (2017). Husbandry of Whale Sharks. In *The Elasmobranch Husbandry Manual II: Recent Advances in the Care of Sharks, Rays and Their Relatives* (Ohio Biological Survey). 87–98
- [Dataset] US Department of Commerce, NOAA. (2005). ESRL Global Monitoring Laboratory - Global Radiation and Aerosols. <https://gml.noaa.gov/grad/solcalc/calcdetails.html>
